# Supplementary material
Source: Research Square preprint supplement (doi:10.21203/rs.3.rs-9242940/v1)
Supplement: Supplementary file 1 [file 130515f874e7f96d10134987.docx]

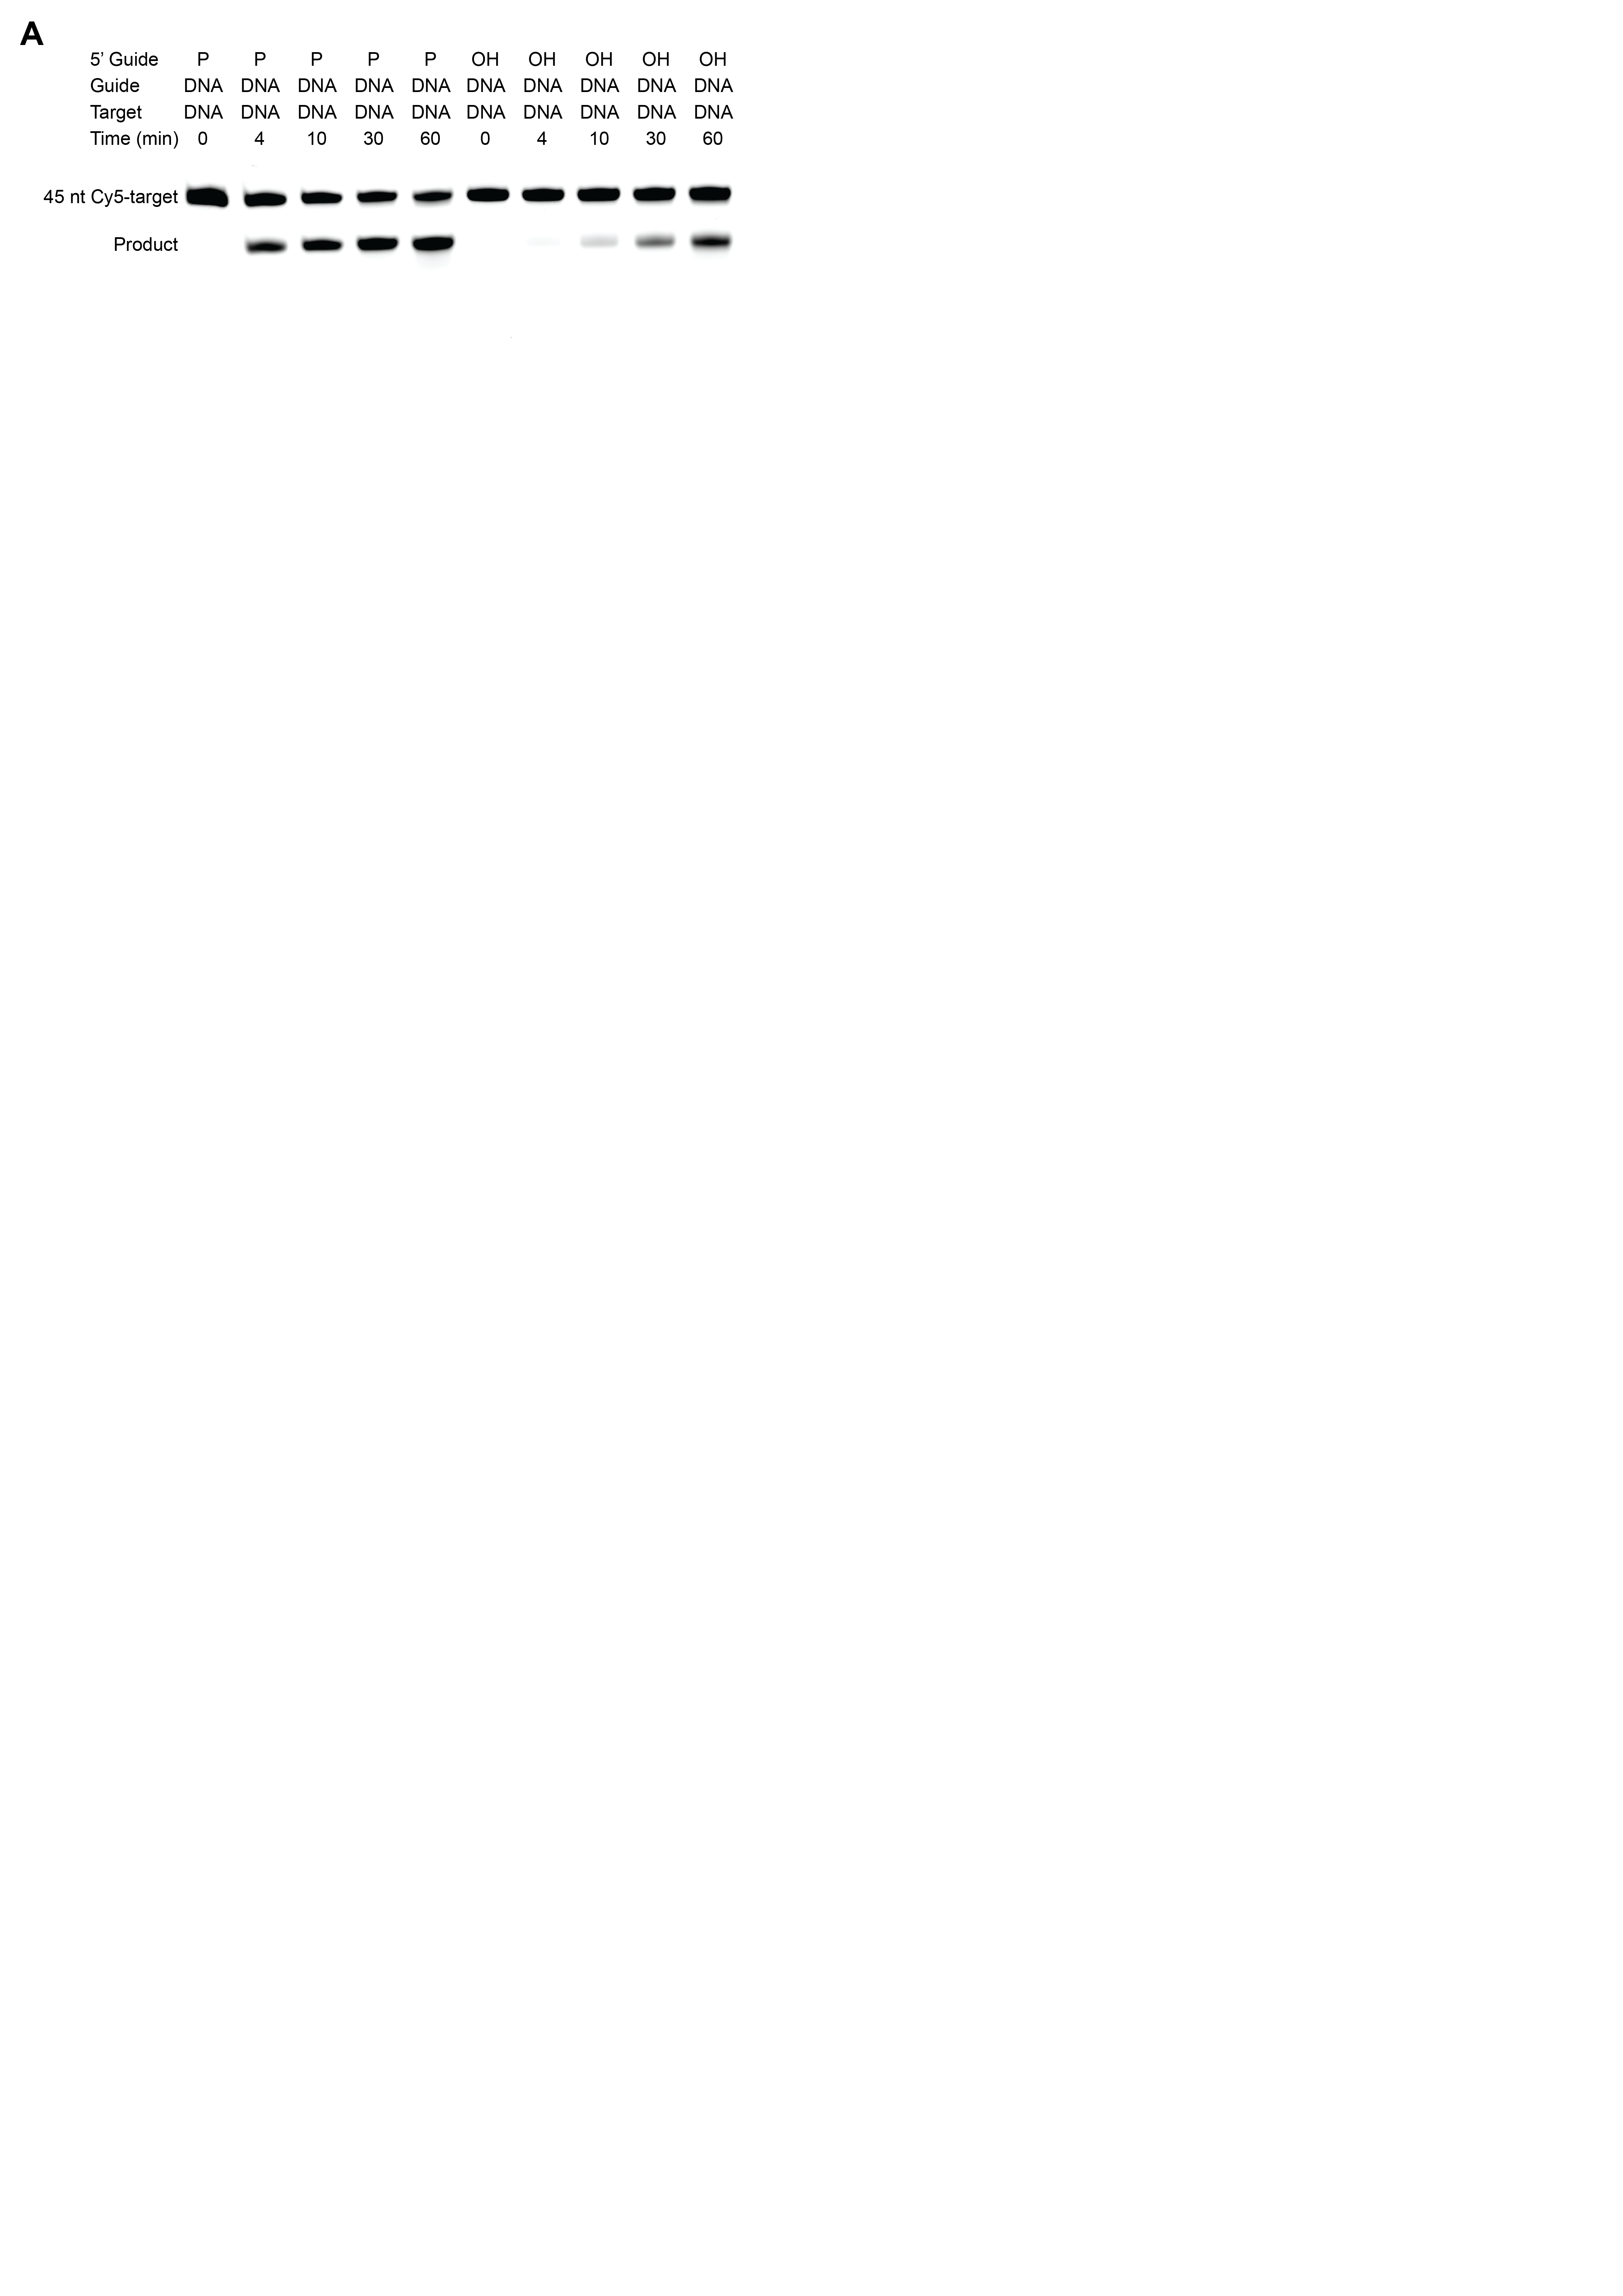


**Extended Data Fig. 1: DNA-guided DNA cleavage by CbAgo.** Gel image of one replicate of DNA-guided DNA cleavage activity of CbAgo.


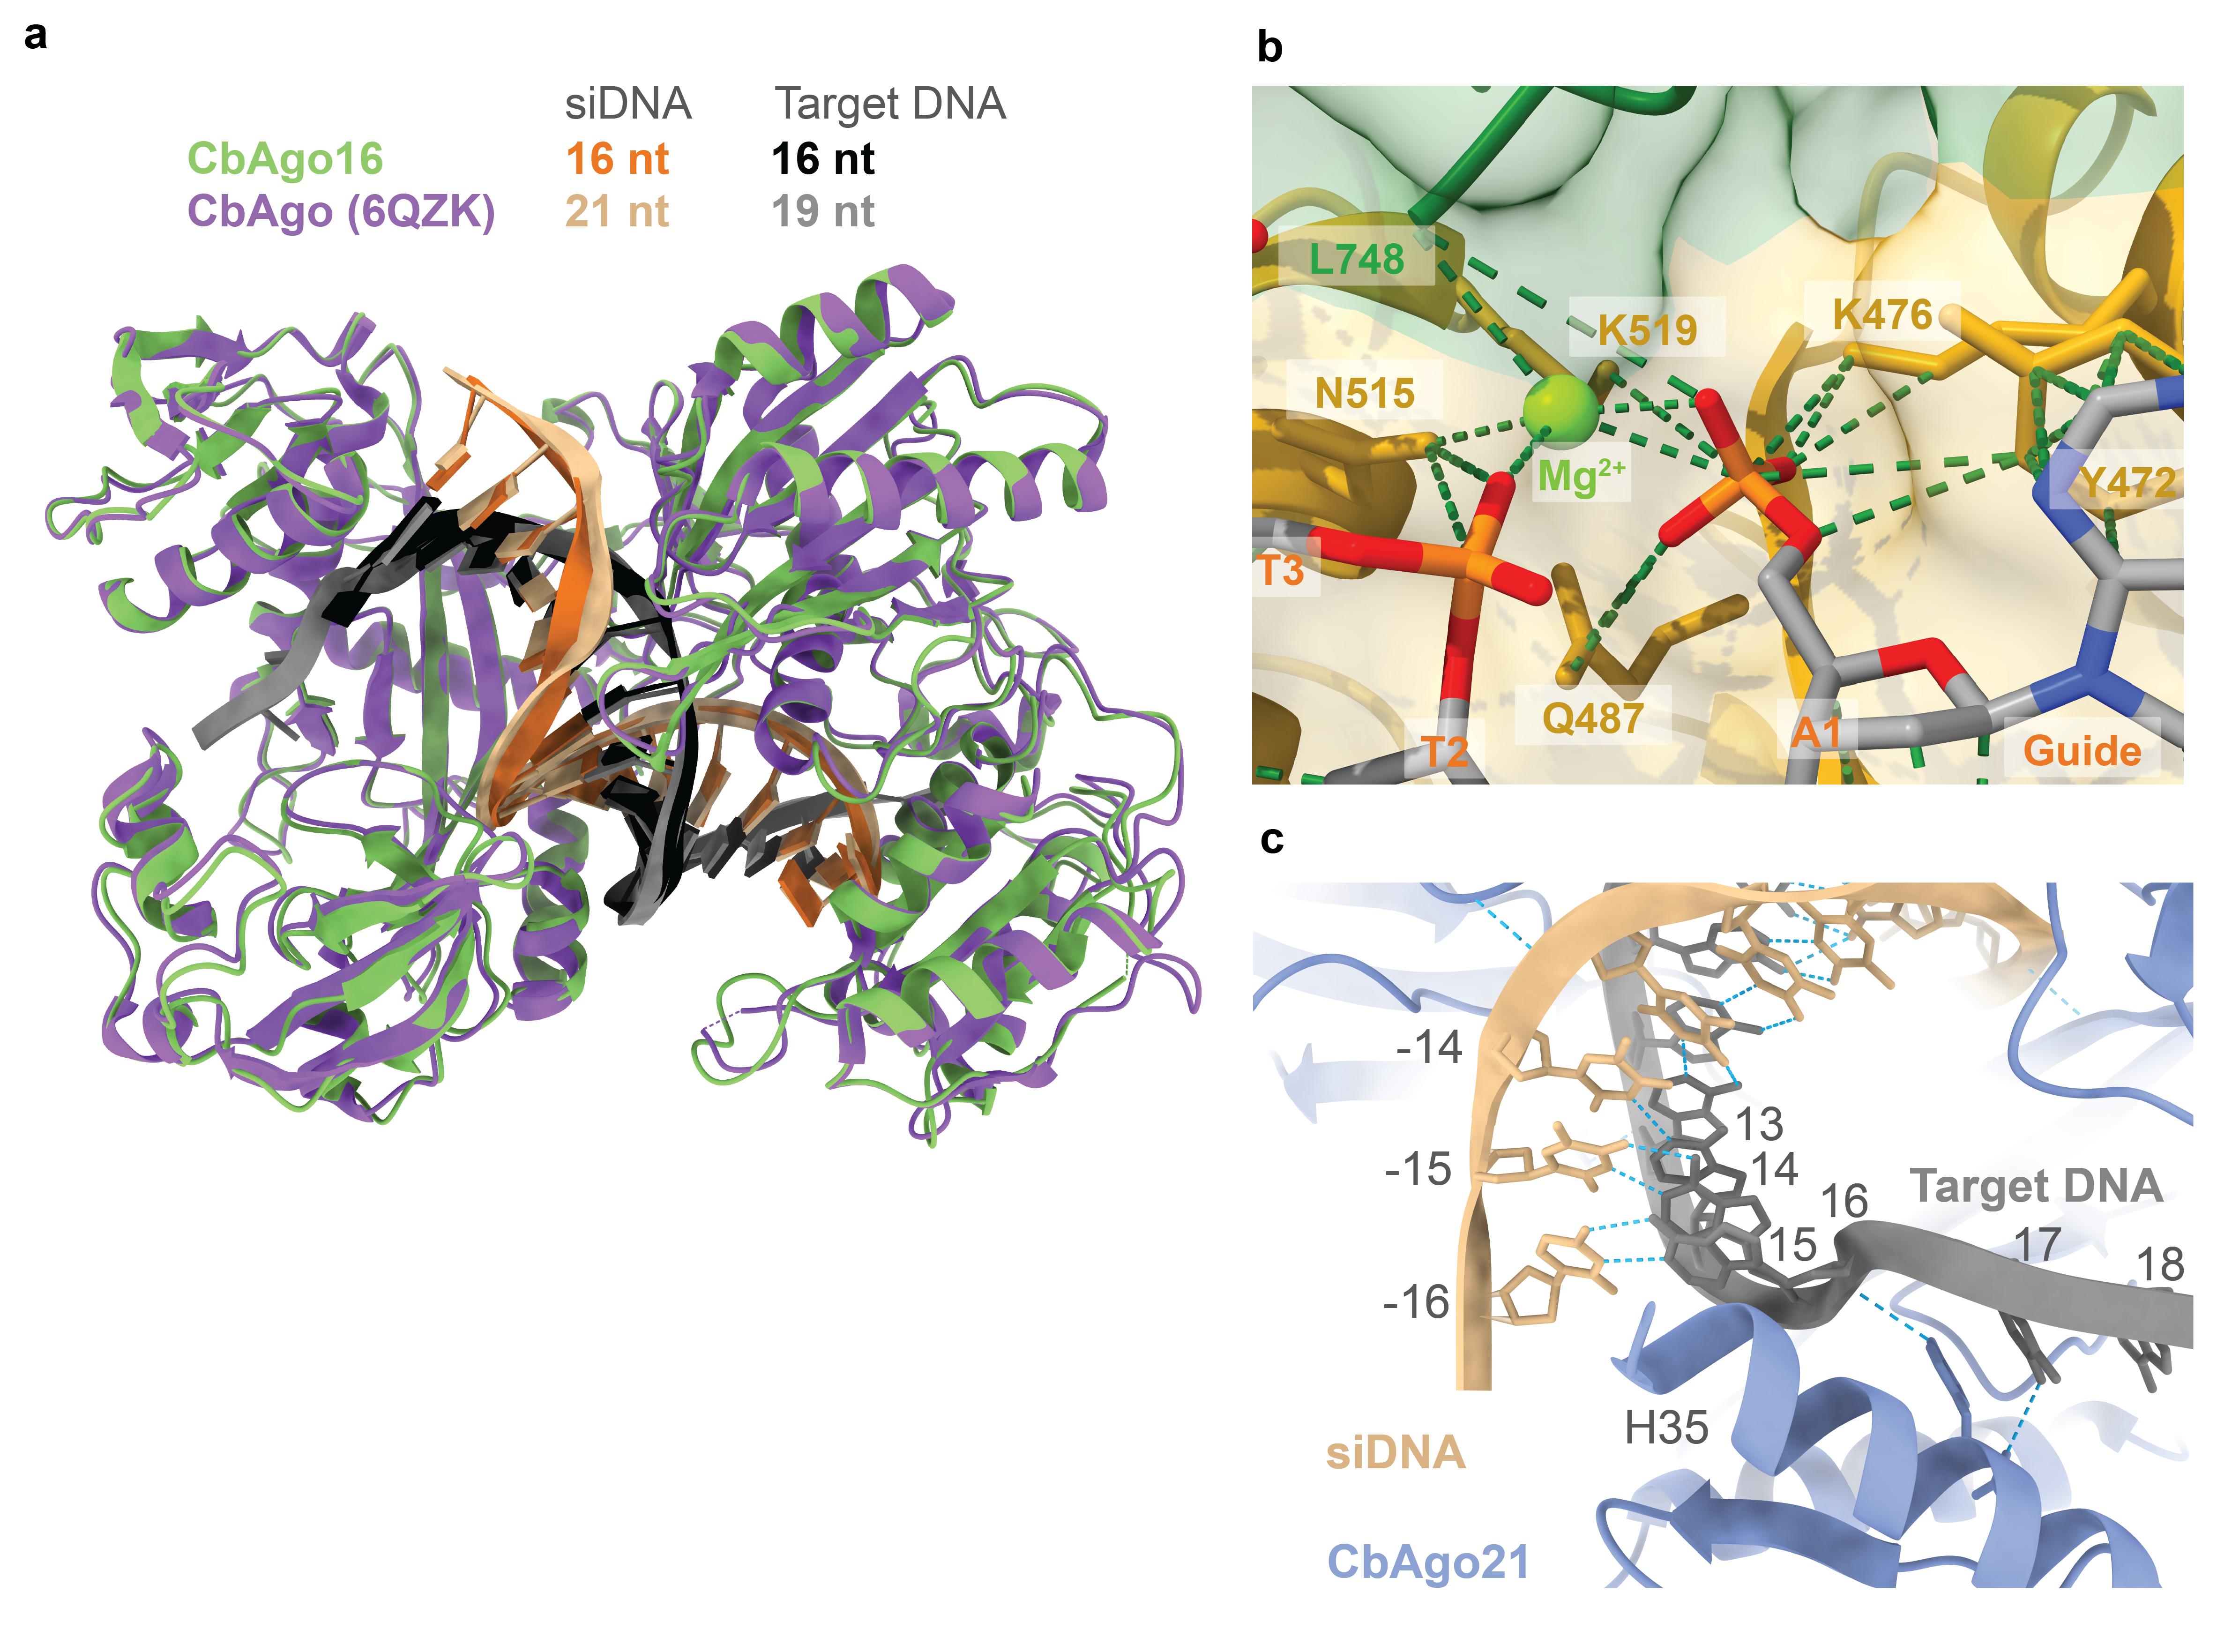


**Extended Data Fig. 2: Structural insights into CbAgo guide/target binding. a,** CbAgo16 structure aligned to CbAgo 6QZK structure, RMSD of 0.65 Å between 727 atom pairs. **b**, Binding of 5’-phosphate of guide DNA in the MID domain pocket in the CbAgo16 structure. Green bonds indicate contacts between guide DNA, magnesium (Mg2+) and CbAgo. **c,** 3’ of guide DNA and 5’ of target DNA duplex, with H35 opening the duplex in the CbAgo21 structure. There is no density past guide DNA residue 16. Blue bonds indicate hydrogen bonding.


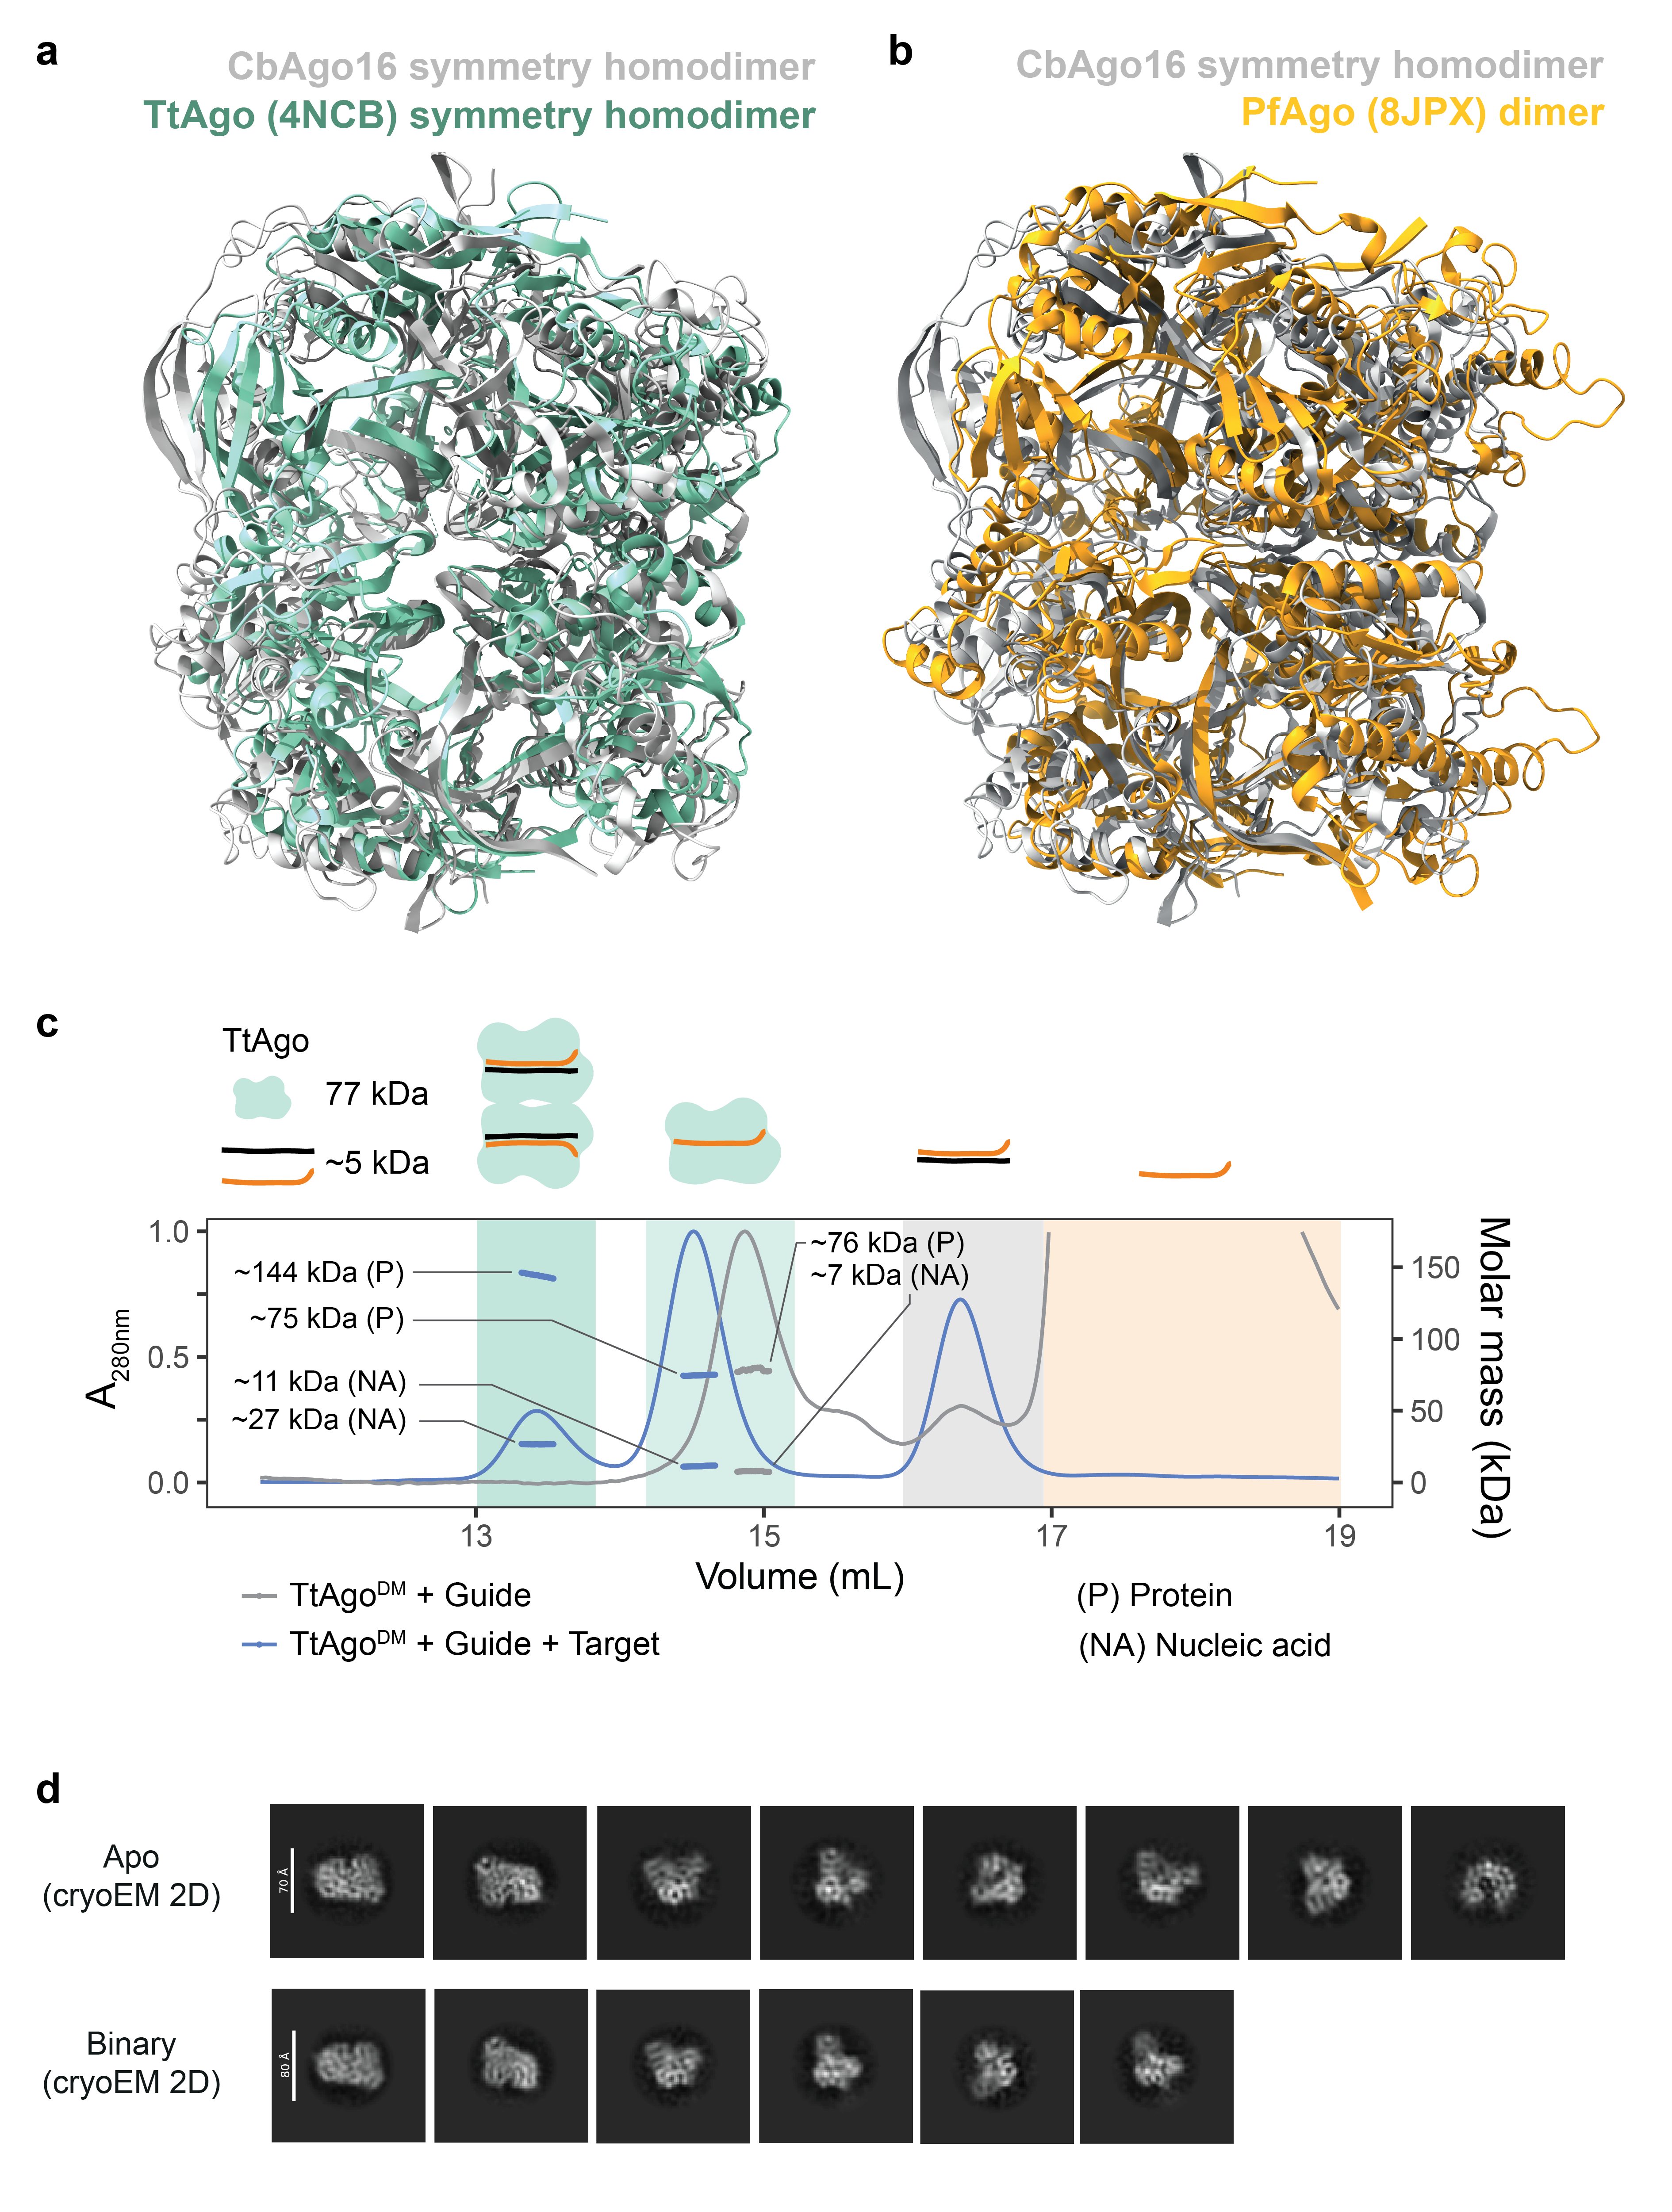


**Extended Data Fig. 3: Structural insights into CbAgo dimerization. a,** CbAgo16 symmetry homodimer and the TtAgo symmetry homodimer (4NCB) with only one (bottom) subunit used in alignment. **b**, CbAgo16 symmetry homodimer and the PfAgo dimer (8JPX) with only one (bottom) subunit used in alignment. **c**, Monomeric and dimeric TtAgoDM bound to 5’phosphorylated siDNA (and target DNA) as resolved with SEC-MALS. Molar mass of the protein (P) or nucleic acid (NA) at the corresponding elution fraction is indicated. **d**, CryoEM 2D classes of CbAgoDM (apo) and CbAgoDM bound to guide DNA (binary).


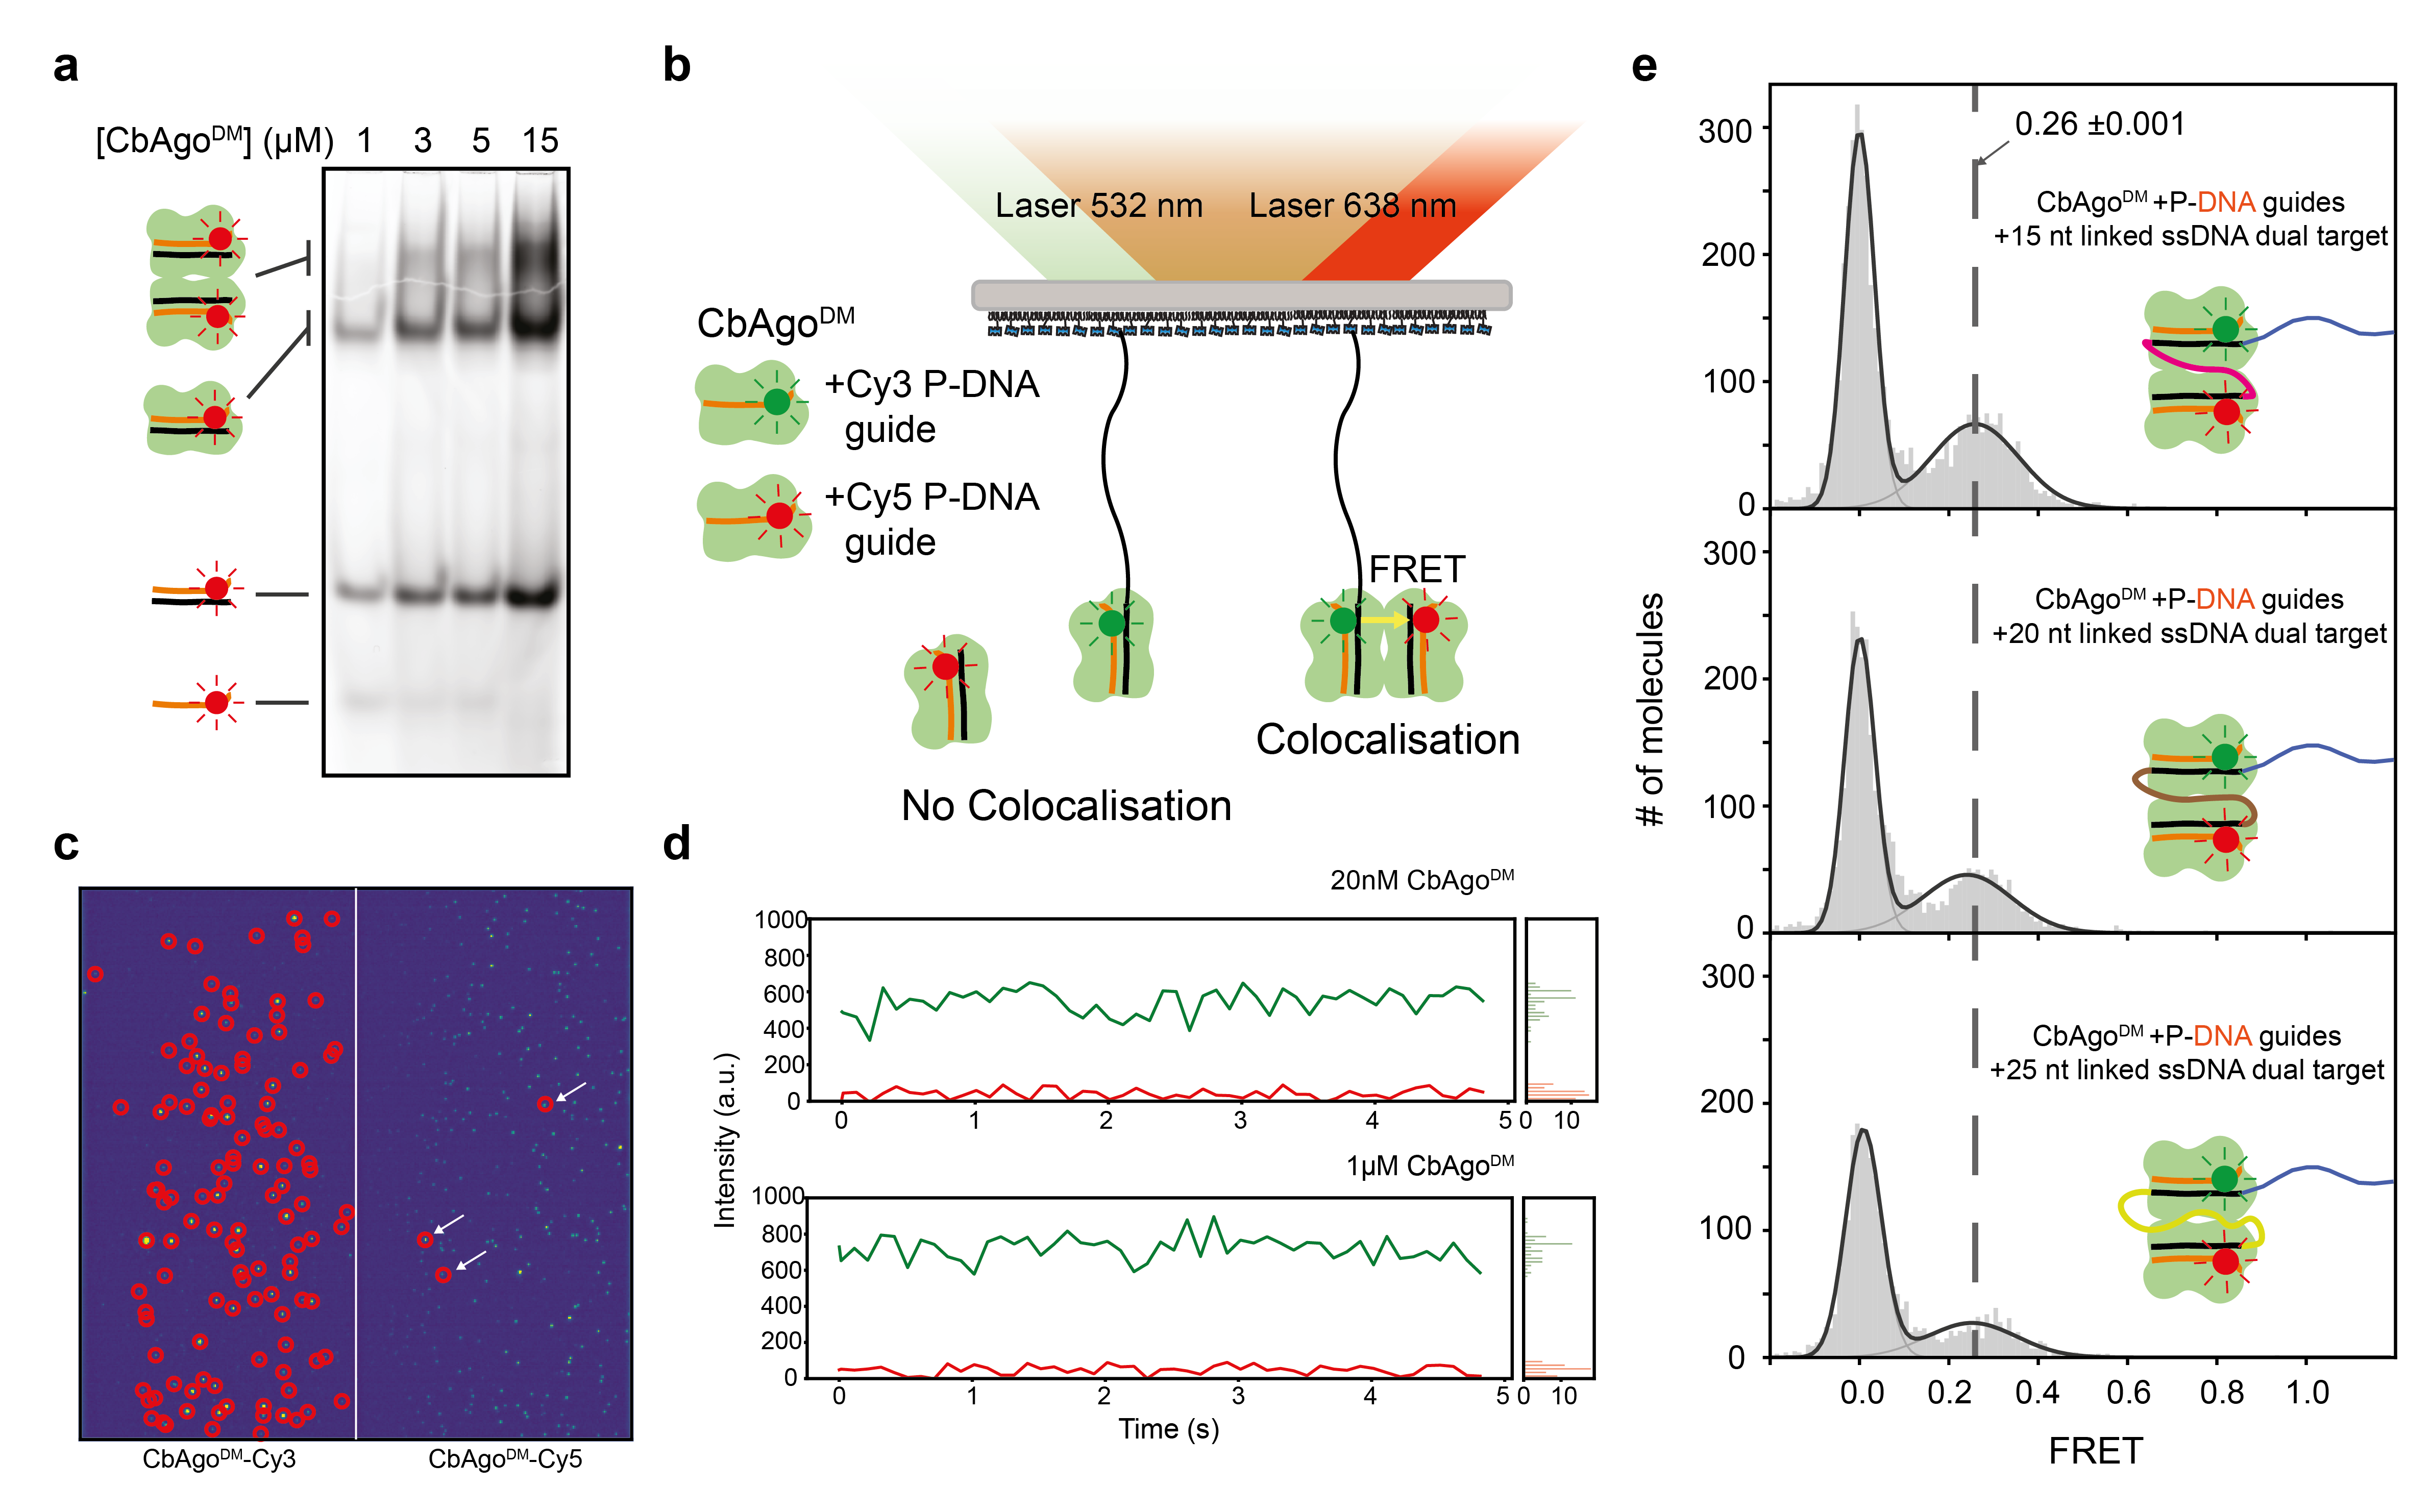


**Extended Data Fig. 4: Concentration dependence of CbAgo and CbAgo dimerization with varying linkers. a,** Native PAGE - electrophoretic mobility shift assay (EMSA) showing concentration dependent dimerization. **b,** Schematic of the single-molecule total internal reflection fluorescence (smTIRF) microscopy with immobilized and free targets. CbAgoDM is bound to Cy3- or Cy5-labelled P-DNA (CbAgoDM-Cy3/Cy5), after which CbAgoDM:guide DNA-Cy3 is first immobilized on a ssDNA target, and CbAgoDM:guide DNA-Cy5 is bound to a free ssDNA target and introduced from solution. Interaction between the CbAgo:guide DNA-Cy3 and CbAgo:guide DNA Cy5 would result in colocalization of Cy3 and Cy5 signals and FRET. **c,** smTIRF image of CbAgoDM:guide-DNA-Cy3 (left) and CbAgoDM:guide DNA-Cy5 (right) showing few colocalizing events (arrow). **d,** Representative time traces with Cy3 (green) and Cy5 (red) signals with anti-correlated intensity fluctuation of 20 nM CbAgoDM (top) and 1 µM CbAgoDM (bottom). **e,** FRET efficiency histograms: 15-20-25 nt linked dual target DNA with CbAgoDM.


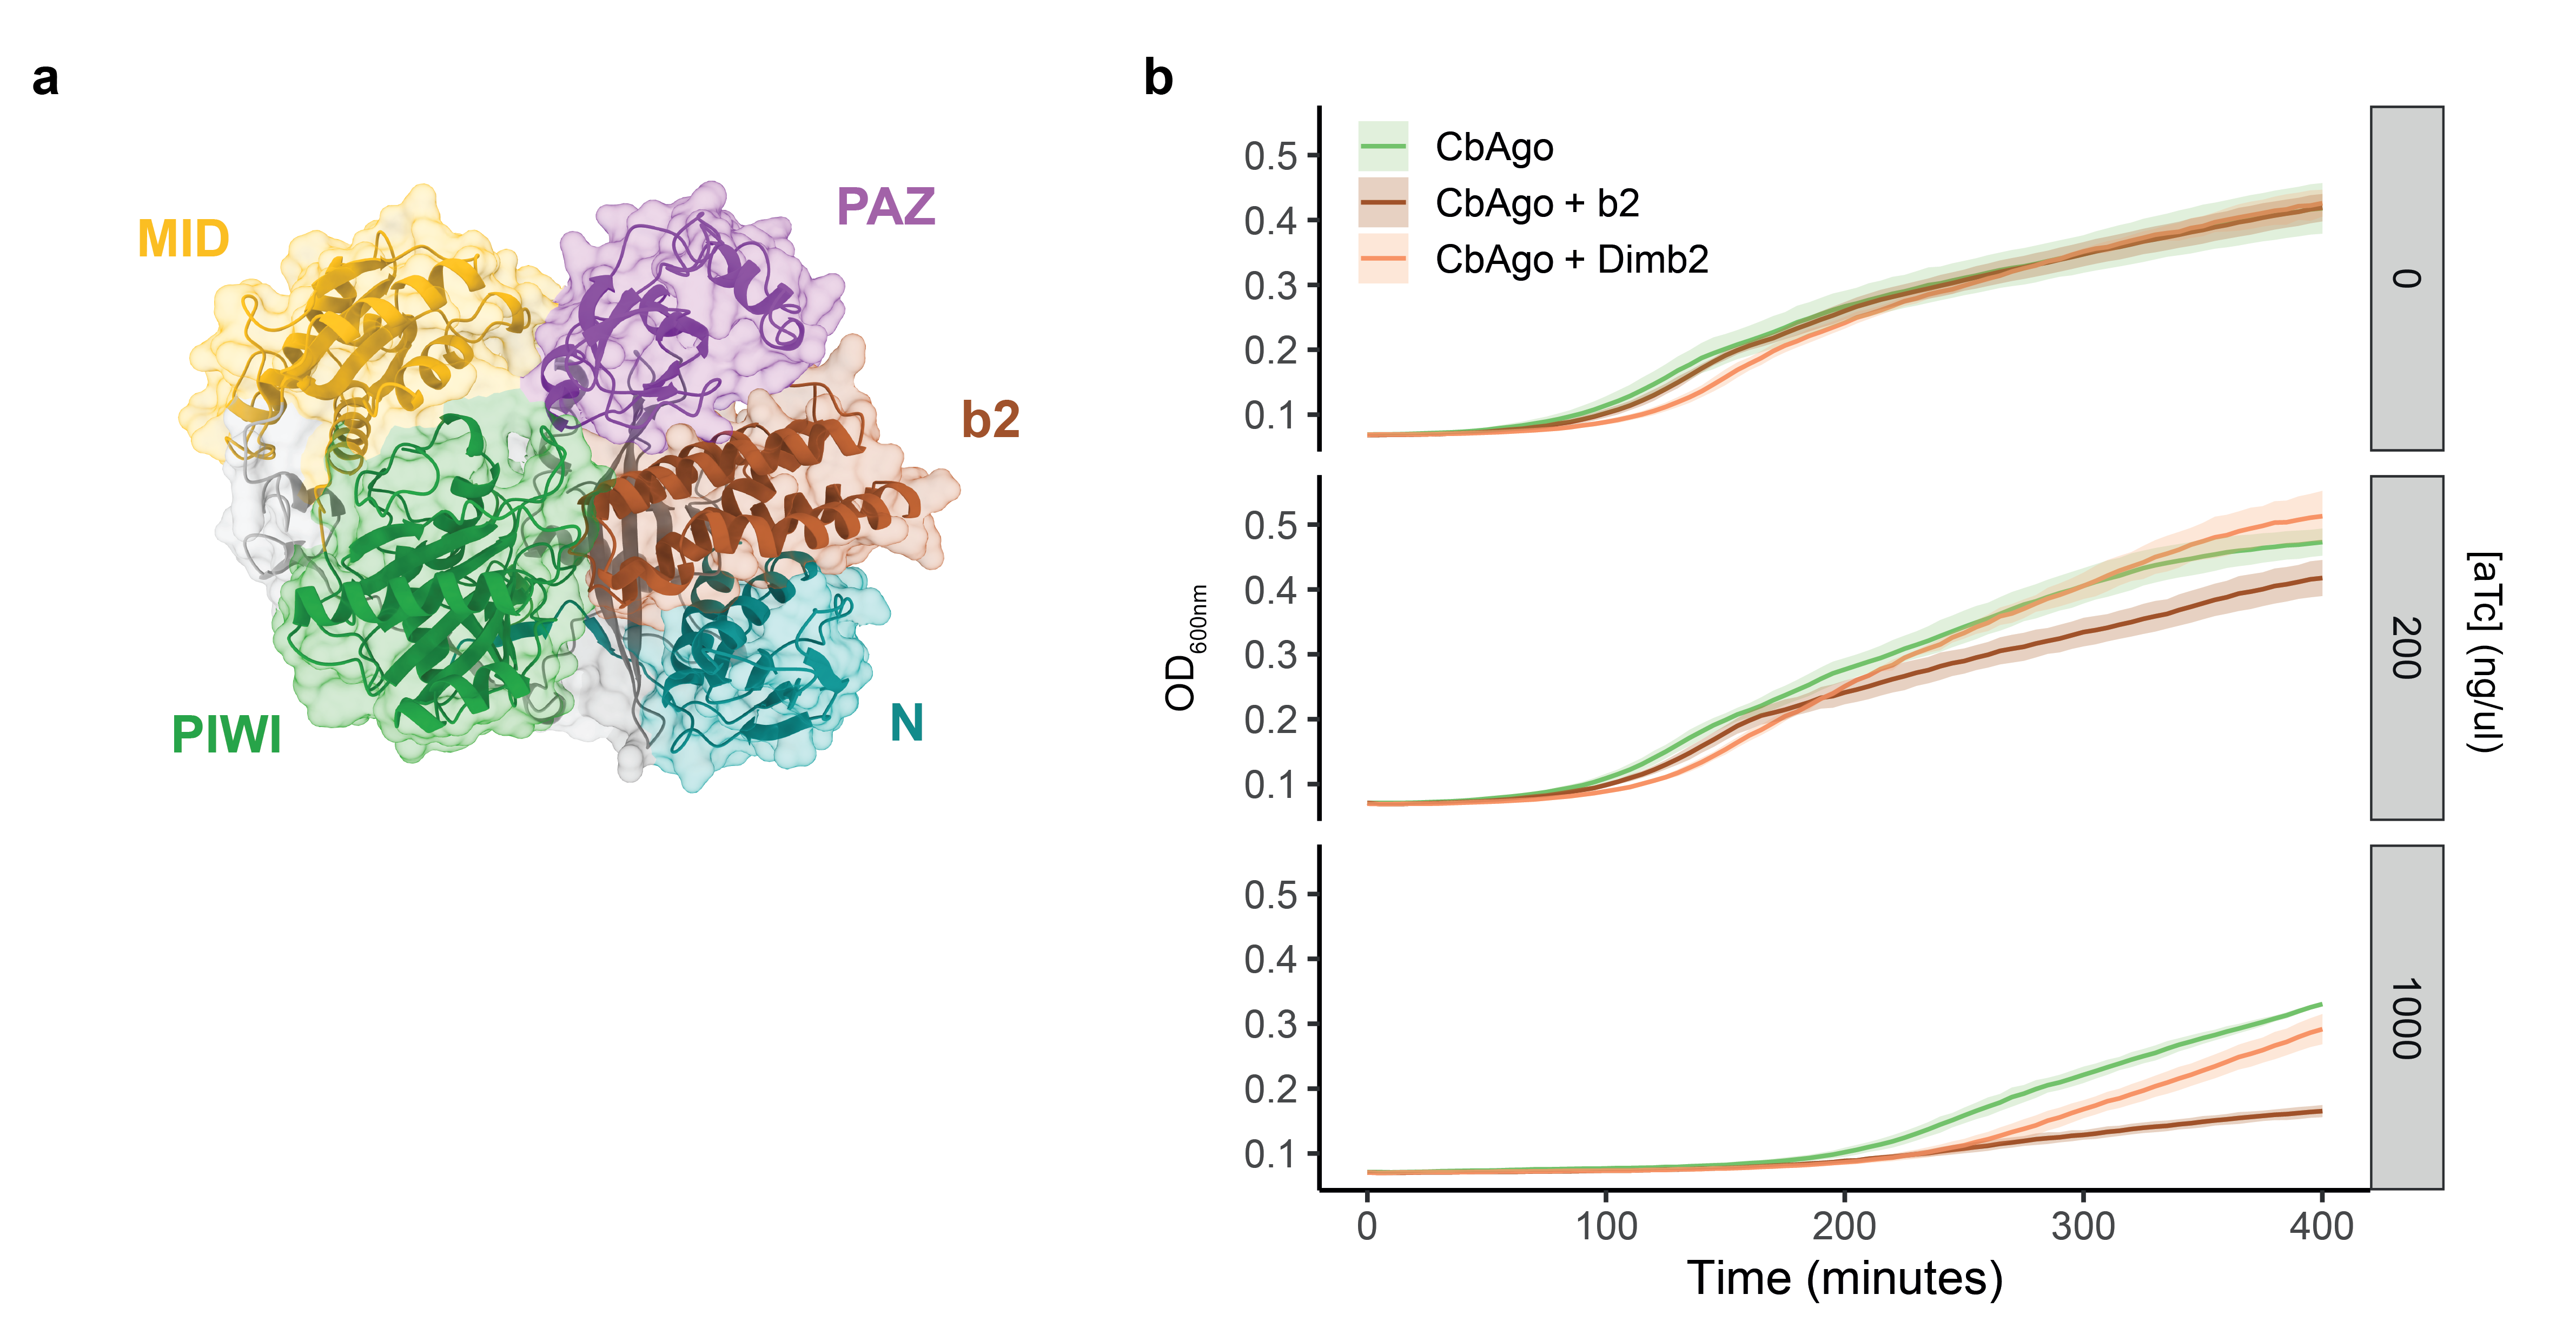


**Extended Data Fig. 5: Effect of BindCraft binders on growth of *E. coli* cells expressing CbAgo. a,** CbAgo-b2 (CbAgo binder2) interaction prediction by Alphafold2. Domains are colored, and b2 in sienna orange-brown. **b,** Growth curves of *E. coli* BW25113 strains with integrated CbAgo under PBAD, and on pSC101 encoded binders b2 or Dimb2 under PTET with different concentrations of aTc induction. Three biological replicates shown.

**Extended Data Table 1 |** Oligonucleotide sequences

| **Name** | **Sequence** | **Purpose** | **Cloning** | **Binding assays** | **Cleavage assays** | **Crystallography** | **SEC-MALS & Crosslinking** | **Single-molecule** |
| --- | --- | --- | --- | --- | --- | --- | --- | --- |
| oDZ0001 | GAGAAAATTGCAGAAACCATTCTGC | PCR backbone of CbAgo PIWI-PIWI’ mutant (R545G/E546G/K547G/S575A) | x |  |  |  |  |  |
| oDZ0002 | TTTAATAATCCACGGAATCCCCCC | CbAgo PIWI-PIWI’ mutant (R545G/E546G/K547G/S575A) | x |  |  |  |  |  |
| oDZ0003 | CGCCGGGATTAAATTTAACATTATTGAGGTG | CbAgo PIWI-PIWI mutant (D436A/T438A/K441A/R445A/K448A/K481A/D589A/N590A/E597A/K628A/K627A) | x |  |  |  |  |  |
| oDZ0004 | GGCACCGAGTTTATAAGATTCGAAAATAC | M2(D436A/T438A/K441A/R445A/K448A/K481A/D589A/N590A/E597A/K628A/ K627A) | x |  |  |  |  |  |
| gbDZ001 | ATTTTCGAATCTTATAAACTCGGTGCCATTGCCGAATATGCCGCAACCGCTGCCAAGCTAGCCGAACATGAAAAGGTGGGTTTTGTGATTGCAGTGATTCCGGATATGAATGAACTGGAAGTGGAAAATCCGTATAATCCGTTTAAAAAAGTATGGGCAGCCCTGAATATTCCGAGCCAGATGATTACCCTGAAAACCACCGAAAAATTTAAAAATATTGTTGATAAGTCTGGTCTATATTATCTACACAATATTGCTCTCAATATTCTAGGGAAAATTGGGGGGATTCCGTGGATTATTAAAGATATGCCGGGTAATATTGATTGTTTCATTGGGCTAGATGTGGGTACCCGTGAAAAAGGTATTCATTTTCCGGCATGTAGCGTTCTATTTGATAAATATGGGAAACTGATTAATTATTATAAGCCGACCATTCCGCAGTCTGGTGAGAAAATTGCAGAAACCATTCTGCAAGAGATTTTCGCCGCCGTTCTGATTAGCTATAAAGCCGAAAATGGGGAATATCCGAAAAATATTGTGATTCATCGTGATGGGTTTTCTCGTGAAAATATTGATTGGTATAAAGAATATTTTGATGCCGCCGGGATTAAATTTAACATTATTGAG | fragment of M1 mutant for CbAgo,R545G/E546G/K547G/S575A | x |  |  |  |  |  |
| gbDZ002 | GGGGGGATTCCGTGGATTATTAAAGATATGCCGGGTAATATTGATTGTTTCATTGGGCTAGATGTGGGTACCGGAGGAGGAGGTATTCATTTTCCGGCATGTAGCGTTCTATTTGATAAATATGGGAAACTGATTAATTATTATAAGCCGACCATTCCGCAGGCAGGTGAGAAAATTGCAGAAACCATTCTGCAA | fragment of M2 mutant for CbAgo,D436A/T438A/K441A/R445A/K448A/K481A/D589A/N590A/E597A/ K628A/K627 | x |  |  |  |  |  |
| FP-g01 | /5Phos/rUrGrArGrGrUrArGrUrArGrGrUrUrGrU/3ATTO532N/ | P-siRNA ATTO532 labelled |  | x |  |  |  |  |
| FP-g02 | /5Phos/TGAGGTAGTAGGTTGT/3ATTO532N/ | P-siDNA ATTO532 labelled |  | x |  |  |  |  |
| FP-g03 | /5Phos/rUrGrArGrGrUrArGrUrArGrGrUrUrGrU | P-siRNA |  | x | x |  | x |  |
| oDS423/FP-g04 | /5Phos/TGAGGTAGTAGGTTGT | P-siDNA |  | x | x |  | x |  |
| FP-g05 | rUrGrArGrGrUrArGrUrArGrGrUrUrGrU/3ATTO532N/ | OH-siRNA ATTO532 labelled |  | x |  |  |  |  |
| FP-g06 | TGAGGTAGTAGGTTGT/3ATTO532N/ | OH-siDNA ATTO532 labelled |  | x |  |  |  |  |
| FP-g07 | rUrGrArGrGrUrArGrUrArGrGrUrUrGrU | OH-siRNA |  |  | x |  |  |  |
| FP-g08 | TGAGGTAGTAGGTTGT | OH-siDNA |  | x | x |  | x |  |
| FP-t01 | /5ATTO532N/rArCrArArCrCrUrArCrUrArCrCrUrCrA | Target RNA ATTO532 labelled |  | x |  |  |  |  |
| FP-t02 | /5ATTO532N/ACAACCTACTACCTCA | Target DNA ATTO532 labelled |  | x |  |  |  |  |
| FP-t03 | rArCrArArCrCrUrArCrUrArCrCrUrCrA | Target RNA |  | x |  |  | x |  |
| **Name** | **Sequence** | **Purpose** | **Cloning** | **Binding assays** | **Cleavage assays** | **Crystallography** | **SEC-MALS & Crosslinking** | **Single-molecule** |
| oDS424/FP-t04 | ACAACCTACTACCTCA | Target DNA |  | x |  |  | x |  |
| oDS401 | /5Cy5/AAACGACGGCCAGTGCCAAGCTTACTATACAACCTACTACCTCAT | Target DNA Cy5 labelled |  |  | x |  |  |  |
| oDS403 | /5Cy5/rArArArCrGrArCrGrGrCrCrArGrUrGrCrCrArArGrCrU rUrArCrUrArUrArCrArArCrCrUrArCrUrArCrCrUrCrArU | Target RNA Cy5 labelled |  |  | x |  |  |  |
| oDS418 | /5Phos/ATTTATGTGATTTTTC | 16 nt siDNA in CbAgo16 |  |  |  | x |  |  |
| oDS420 | GAAAAATCACATAAAT | 16 nt target DNA in CbAgo16 |  |  |  | x |  |  |
| oDS379 | /5Phos/ATTTATGTGATTTTTCATAGT | 21 nt siDNA in CbAgo21 |  |  |  | x |  |  |
| oDS380 | TATGAAAAATCACATAAAA | 19 nt target DNA in CbAgo21 |  |  |  | x |  |  |
| CB13 | /5Phos/TGAGGTAG(C6-amino-dT)AGGTTGTATAGTT | P-siDNA internally labeled |  |  |  |  |  | x |
| AS38 | AACTATACAACCTACTACCTCATTTTTTTTTTTTTTTTTT-Biotin | Single immobilized target DNA |  |  |  |  |  | x |
| AS39 | AACTATACAACCTACTACCTCA | Short (free) target DNA |  |  |  |  |  | x |
| AS54 | AACTATACAACCTACTACCTCATTTTTTTTTTTTTTTAACTATACAACCTA CTACCTCATTTTTTTTTTTTTTTTTTTT-Biotin | Dual immobilized target DNA 15 nt linker |  |  |  |  |  | x |
| AS53 | AACTATACAACCTACTACCTCATTTTTTTTTTTTTTTTTTTTAACTATACA ACCTACTACCTCATTTTTTTTTTTTTTTTTTTT-Biotin | Dual immobilized target DNA 20 nt linker |  |  |  |  |  | x |
| AS56 | AACTATACAACCTACTACCTCATTTTTTTTTTTTTTTTTTTTTTTTTAACT ATACAACCTACTACCTCATTTTTTTTTTTTTTTTTTTT-Biotin | Dual immobilized target DNA 25 nt linker |  |  |  |  |  | x |
| AS57 | AACTATACAACCTACTACCTCATTTTTTTTTTTTTTTTTTTTTTTTTTTTT TAACTATACAACCTACTACCTCATTTTTTTTTTTTTTTTTTTT-Biotin | Dual immobilized target DNA 30 nt linker |  |  |  |  |  | x |
| AS55 | AAAAAAAAAAAAAAAAAAAA | Poly(A) disruptor |  |  |  |  |  | x |
